# Supplementary material for: Clinically Relevant Germline Mutations in a Cohort of Young Women with Breast Cancer: A Comprehensive Analysis of Hereditary-Cancer Genes from Whole-Exome Sequencing
Source: Preprints.org preprint supplement (doi:10.20944/preprints202008.0718.v1), 2020-08-31
Supplement: Supplementary file 1 [file Supplementary Table 6. Variants of uncertain significance.xlsx]

## Sheet: VUS
HGAL	Tissue of Origin	Project Association	Gene	Mutation	PID	Comments	Status	Sample Type	Classification	Chromosome	Position	db SNP ID
DU300015	Blood	Mexico City Breast Cancer		WT	15	Female Early-onset breast cancer		DNA	CHEK2 VUS	chr22	29107974	rs121908702	C	T	3	p.Glu282Lys	VUS	moderate	BC_BC_DL0117675_A														1	1		242
DU300017	Blood	Mexico City Breast Cancer		WT	17	Female Early-onset breast cancer		DNA	BRCA1 VUS	chr17	41245845	rs80356910	G	A	3	missense_variant	VUS	p.Pro568Leu	BRCA1		BC_BC_DL0117677_A
DU300020	Blood	Mexico City Breast Cancer		WT	20	Female Early-onset breast cancer		DNA	ATM VUS	chr11	108153462	.	T	C	3		Moderate	p.Phe1201Ser	VUS		BC_BC_DL0117680_A
DU300024	Blood	Mexico City Breast Cancer		WT	24	Female Early-onset breast cancer		DNA	NF1 VUS	chr17	29654757	rs771597781	G	A	3	moderate	p.Asp1837Asn	P/VUS		BC_BC_DL0117684_A
DU300038	Blood	Mexico City Breast Cancer		WT	38	Female Early-onset breast cancer		DNA	RAD51C VUS	chr17	56772398	rs786202890	G	T	3	Moderate	p.Lys84Asn	AC1	VUS	VALID	BC_BC_DL0117698_A
DU300048	Blood	Mexico City Breast Cancer		WT	48	Female Early-onset breast cancer		DNA	BRCA2 VUS	chr13	32971078	.	A	G	3	ABHet=0.491;AC=1;AF=4.202e-03;AN=238;ANN=G|missense_variant|MODERATE|BRCA2|ENSG00000139618|transcript|ENST00000380152|protein_coding|26/27|c.9545A>G|p.His3182Arg|9778/10930|9545/10257|3182/3418||,G|missense_variant|MODERATE|BRCA2|ENSG00000139618|transcript|ENST00000544455|protein_coding|26/28|c.9545A>G|p.His3182Arg|9772/10984|9545/10257|3182/3418||,G|3_prime_UTR_variant|MODIFIER|BRCA2|ENSG0000013…	BRCA2	p.His3182Arg	VUS		BC_BC_DL0117708_A
DU300049	Blood	Mexico City Breast Cancer		WT	49	Female Early-onset breast cancer		DNA	CHEK2 VUS	chr22	29107982	rs587782471	A	G	3	p.Leu279Pro	VUS	moderate	BC_BC_DL0117709_A, BC_BC_DL0117759_A, BC_BC_DL0117913_A
DU300054	Blood	Mexico City Breast Cancer		WT	54	Female Early-onset breast cancer		DNA	BRCA2 VUS	chr13	32907329	rs587782713	G	C	3	ABHet=0.353;AC=1;AF=4.202e-03;AN=238;ANN=C|missense_variant|MODERATE|BRCA2|ENSG00000139618|transcript|ENST00000380152|protein_coding|10/27|c.1714G>C|p.Val572Leu|1947/10930|1714/10257|572/3418||,C|missense_variant|MODERATE|BRCA2|ENSG00000139618|transcript|ENST00000544455|protein_coding|10/28|c.1714G>C|p.Val572Leu|1941/10984|1714/10257|572/3418||,C|missense_variant|MODERATE|BRCA2|ENSG00000139618|tr…	BRCA2	p.Val572Leu	VUS		BC_BC_DL0117714_A
DU300055	Blood	Mexico City Breast Cancer		WT	55	Female Early-onset breast cancer		DNA	PMS2 VUS	chr7	6029571	rs200513014	T	C	3		p.Asn335Ser	VUS	BC_BC_DL0117715_A
DU300057	Blood	Mexico City Breast Cancer		WT	57	Female Early-onset breast cancer		DNA	BRCA2 VUS	chr13	32969023	rs80359218	G	A	3	ABHet=0.526;AC=1;AF=4.202e-03;AN=238;ANN=A|missense_variant|MODERATE|BRCA2|ENSG00000139618|transcript|ENST00000380152|protein_coding|25/27|c.9454G>A|p.Glu3152Lys|9687/10930|9454/10257|3152/3418||,A|missense_variant|MODERATE|BRCA2|ENSG00000139618|transcript|ENST00000544455|protein_coding|25/28|c.9454G>A|p.Glu3152Lys|9681/10984|9454/10257|3152/3418||,A|missense_variant|MODERATE|BRCA2|ENSG0000013961…	BRCA2	p.Glu3152Lys	VUS CLINVAR VUS LB, Intervar LP	Valid	BC_BC_DL0117717_A
DU300057	Blood	Mexico City Breast Cancer		WT	57	Female Early-onset breast cancer		DNA	ATM VUS	chr11	108163515	rs587779841	A	G	3		Moderate		VUS		BC_BC_DL0117717_A
DU300059	Blood	Mexico City Breast Cancer		WT	59	Female Early-onset breast cancer		DNA	MRE11A VUS	chr11	94189458	rs771215537	T	A	3	valid	p.Asp519Val	no data	VUS	BC_BC_DL0117719_A
DU300068	Blood	Mexico City Breast Cancer		WT	68	Female Early-onset breast cancer		DNA	NF1 VUS	chr17	29548928	.	G	A	3	moderate	p.Glu568Lys	no data	VUS	BC_BC_DL0117728_A
DU300070	Blood	Mexico City Breast Cancer	BRCA2	p.Asp2723Gly	70	Female Early-onset breast cancer		DNA	FANCM VUS	chr14	45605467	rs753797551	C	A	3	moderate	p.Ser78Tyr	no data	VUS	BC_BC_DL0117730_A
DU300074	Blood	Mexico City Breast Cancer		WT	74	Female Early-onset breast cancer		DNA	ATM VUS	chr11	108137926	rs199875915	G	T	3		Moderate		VUS		BC_BC_DL0117734_A
DU300075	Blood	Mexico City Breast Cancer		WT	75	Female Early-onset breast cancer		DNA	XRCC2 VUS	chr7	152345797	rs149186933	C	T	3	moderate	AC1	p.Arg258His	VUS			BC_BC_DL0117735_A
DU300083	Blood	Mexico City Breast Cancer		WT	83	Female Early-onset breast cancer		DNA	ATM VUS	chr11	108175579	rs730881375	G	A	3		Moderate		VUS		BC_BC_DL0117743_A
DU300083	Blood	Mexico City Breast Cancer		WT	83	Female Early-onset breast cancer		DNA	MRE11A VUS	chr11	94230050	rs754542540	G	A	3		p.Arg64Gln	no data	VUS	BC_BC_DL0117743_A
DU300084	Blood	Mexico City Breast Cancer		WT	84	Female Early-onset breast cancer		DNA	NBN VUS	chr8	90983475	rs61754796	C	A	3	moderate	p.Val210Phe	VUS/LB	BC_BC_DL0117744_A
DU300088	Blood	Mexico City Breast Cancer		WT	88	Female Early-onset breast cancer		DNA	FANCM VUS	chr14	45605644	rs748823532	T	C	3	moderate	p.Val137Ala	no data	VUS	BC_BC_DL0117748_A
DU300094	Blood	Mexico City Breast Cancer		WT	94	Female Early-onset breast cancer		DNA	ATM VUS	chr11	108115520	rs776227830	A	G	3		Moderate		VUS		BC_BC_DL0117754_A
DU300096	Blood	Mexico City Breast Cancer		WT	96	Female Early-onset breast cancer		DNA	BRCA1 VUS	chr17	41243941	rs62625308	G	C	3	missense_variant	VUS	p.Arg1203Gly	BRCA1		BC_BC_DL0117756_A
DU300099	Blood	Mexico City Breast Cancer		WT	99	Female Early-onset breast cancer		DNA	CHEK2 VUS	chr22	29107982	rs587782471	A	G	3	p.Leu279Pro	VUS	moderate	BC_BC_DL0117709_A, BC_BC_DL0117759_A, BC_BC_DL0117913_A
DU300100	Blood	Mexico City Breast Cancer		WT	100	Female Early-onset breast cancer		DNA	ATM VUS	chr11	108129785	rs587778067	G	C	3		Moderate		VUS		BC_BC_DL0117760_A
DU300104	Blood	Mexico City Breast Cancer		WT	104	Female Early-onset breast cancer		DNA	RECQL VUS	chr12	21644594	rs754545736	T	A	3	valid	no data	p.Ile25Phe	VUS	BC_BC_DL0117764_A
DU300105	Blood	Mexico City Breast Cancer		WT	105	Female Early-onset breast cancer		DNA	CHEK2 VUS	chr22	29091708	rs760118917	GAAT	G	3	p.Ile459del	VUS		BC_BC_DL0117765_A
DU300107	Blood	Mexico City Breast Cancer	RINT1	Deletion and VUS	107	Female Early-onset breast cancer		DNA	ATM VUS	chr11	108216546	.	G	T	3		Moderate	p.Arg2832Leu	LP/VUS		BC_BC_DL0117767_A
DU300109	Blood	Mexico City Breast Cancer		WT	109	Female Early-onset breast cancer		DNA	ATM VUS	chr11	108196812	rs756898113	A	G	3		Moderate		VUS		BC_BC_DL0117769_A
DU300250	Blood	Mexico City Breast Cancer		WT	250	Female Late-onset BrCa age ≥41		DNA	CHEK2 VUS	chr22	29107982	rs587782471	A	G	3	p.Leu279Pro	VUS	moderate	BC_BC_DL0117709_A, BC_BC_DL0117759_A, BC_BC_DL0117913_A
DU300253	Blood	Mexico City Breast Cancer		WT	253	Female Late-onset BrCa age ≥41		DNA	PMS2 VUS	chr7	6029495	rs567102013	T	C	3		p.Ile360Met	VUS	BC_BC_DL0117916_A
